# Supplementary material for: Reliability Ensemble Averaging of 21st century projections ofterrestrial net primary productivity reduces global and regionaluncertainties
Source: Copernicus journal article supplement (doi:10.5194/esd-2017-83), 2017-09-19
Supplement: Supplementary file 1 [file esd-2017-83-supplement.pdf]

1 **Supplementary Information to “Reliability Ensemble Averaging of 21st century**  
2 **projections of terrestrial net primary productivity”**  
3 **by Exbrayat et al.**

4

5 Fig S1:  $\Delta$ NPP for each model

6 Fig S2: mean annual NPP in each observational dataset

7 Fig S3: variability in each observational dataset

8 Fig S4-12: weights  $R_i$ ,  $R_{B,i}$  and  $R_{D,i}$  assigned to each model for each REA<sub>C</sub>, REA<sub>F</sub> and REA<sub>M</sub>

9

10

11

12

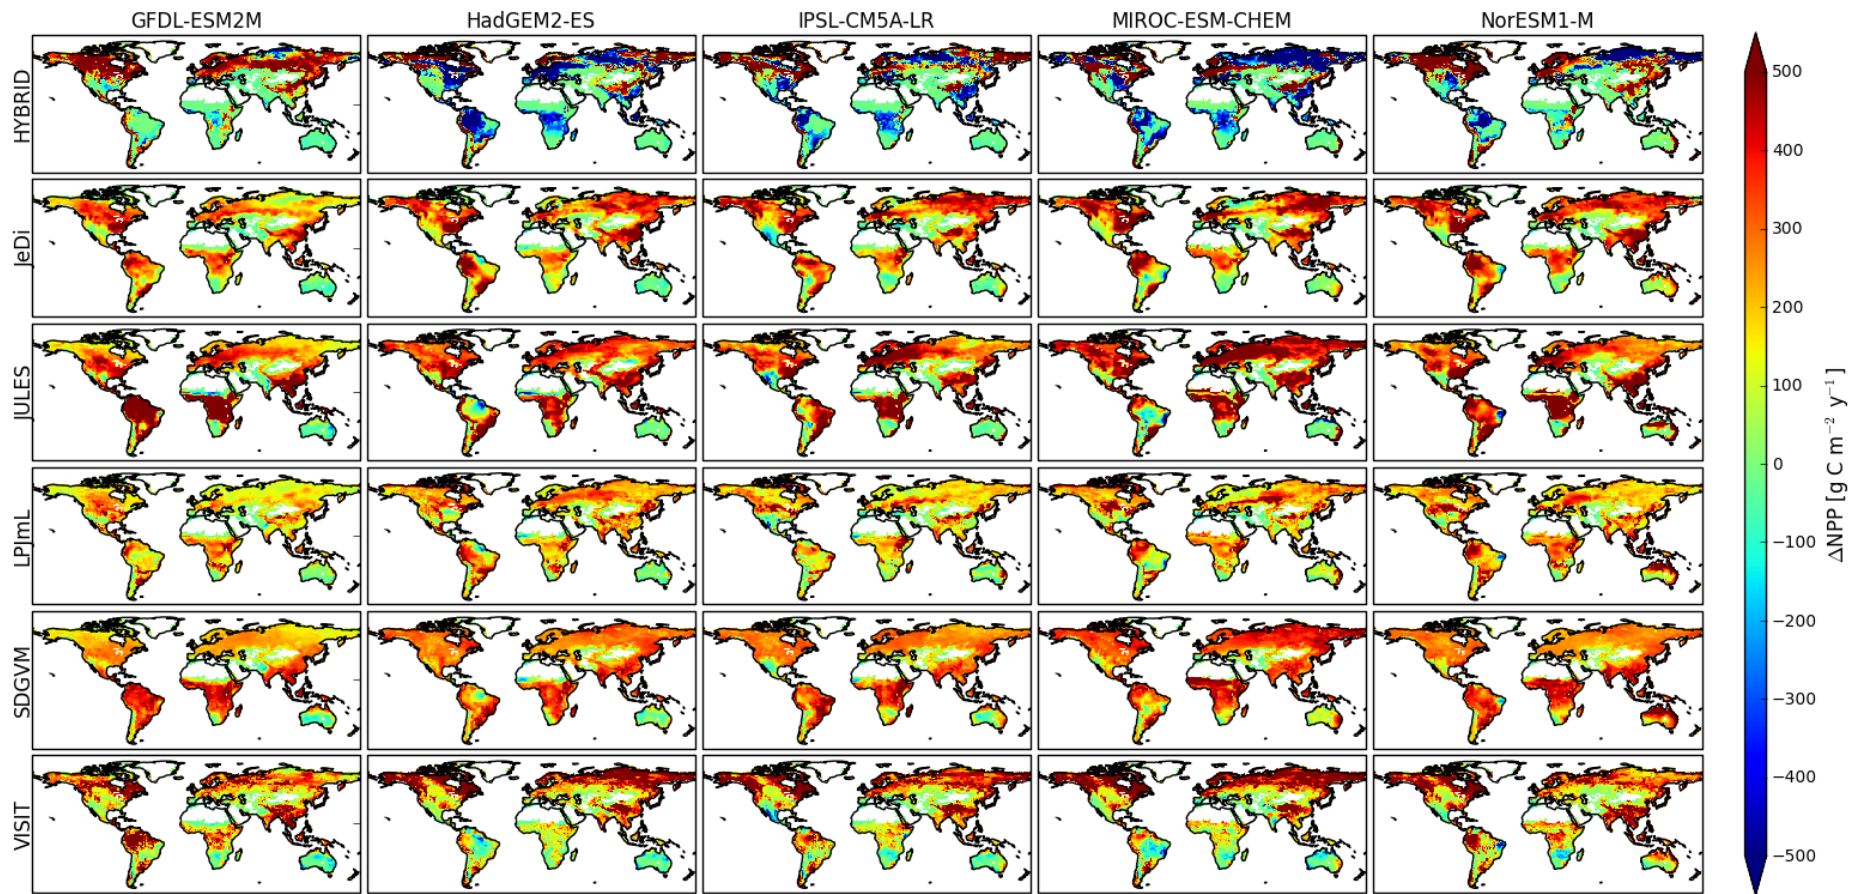

13

14 Figure S1. Mean annual change in NPP ( $\text{g C m}^{-2} \text{y}^{-1}$ ) for each ensemble members.

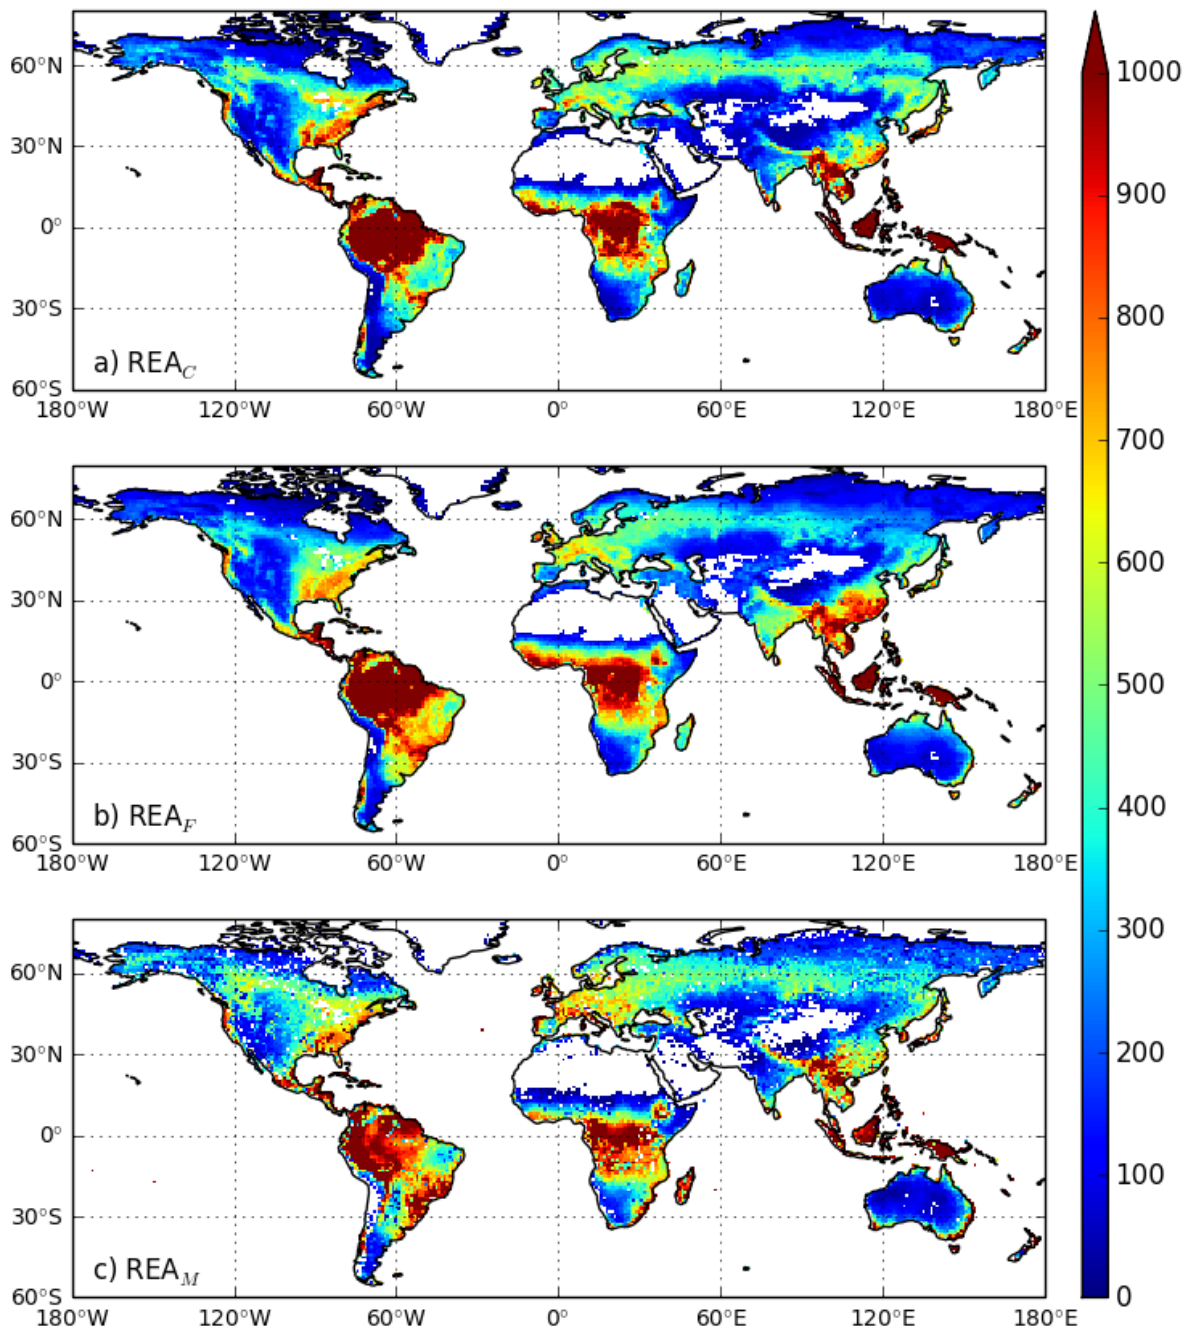

16

17 Figure S2. Mean annual NPP ( $\text{g C m}^{-2} \text{ y}^{-1}$ ) used in (a)  $\text{REA}_C$ , (b)  $\text{REA}_F$  and (c)  $\text{REA}_M$ .

18

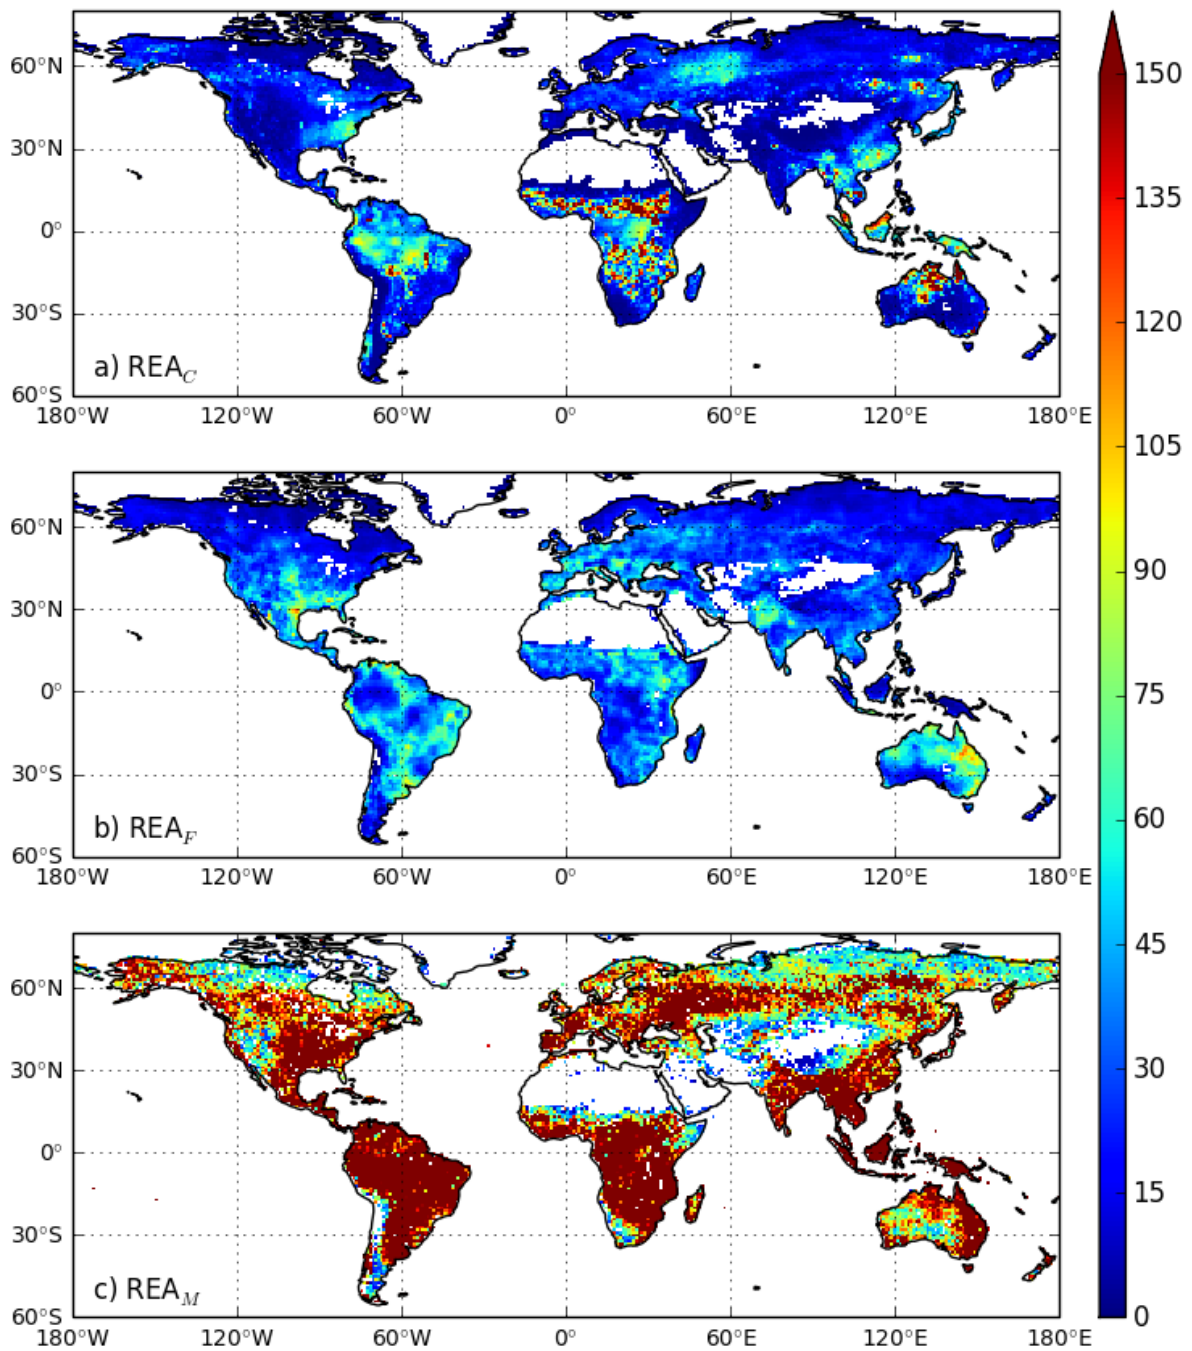

20

21

22 Figure S3. Variability of annual NPP ( $\text{g C m}^{-2} \text{y}^{-1}$ ) used as  $\varepsilon$  (equation 1) in (a)  $REA_C$ , (b)  
 23  $REA_F$  and (c)  $REA_M$ .

24



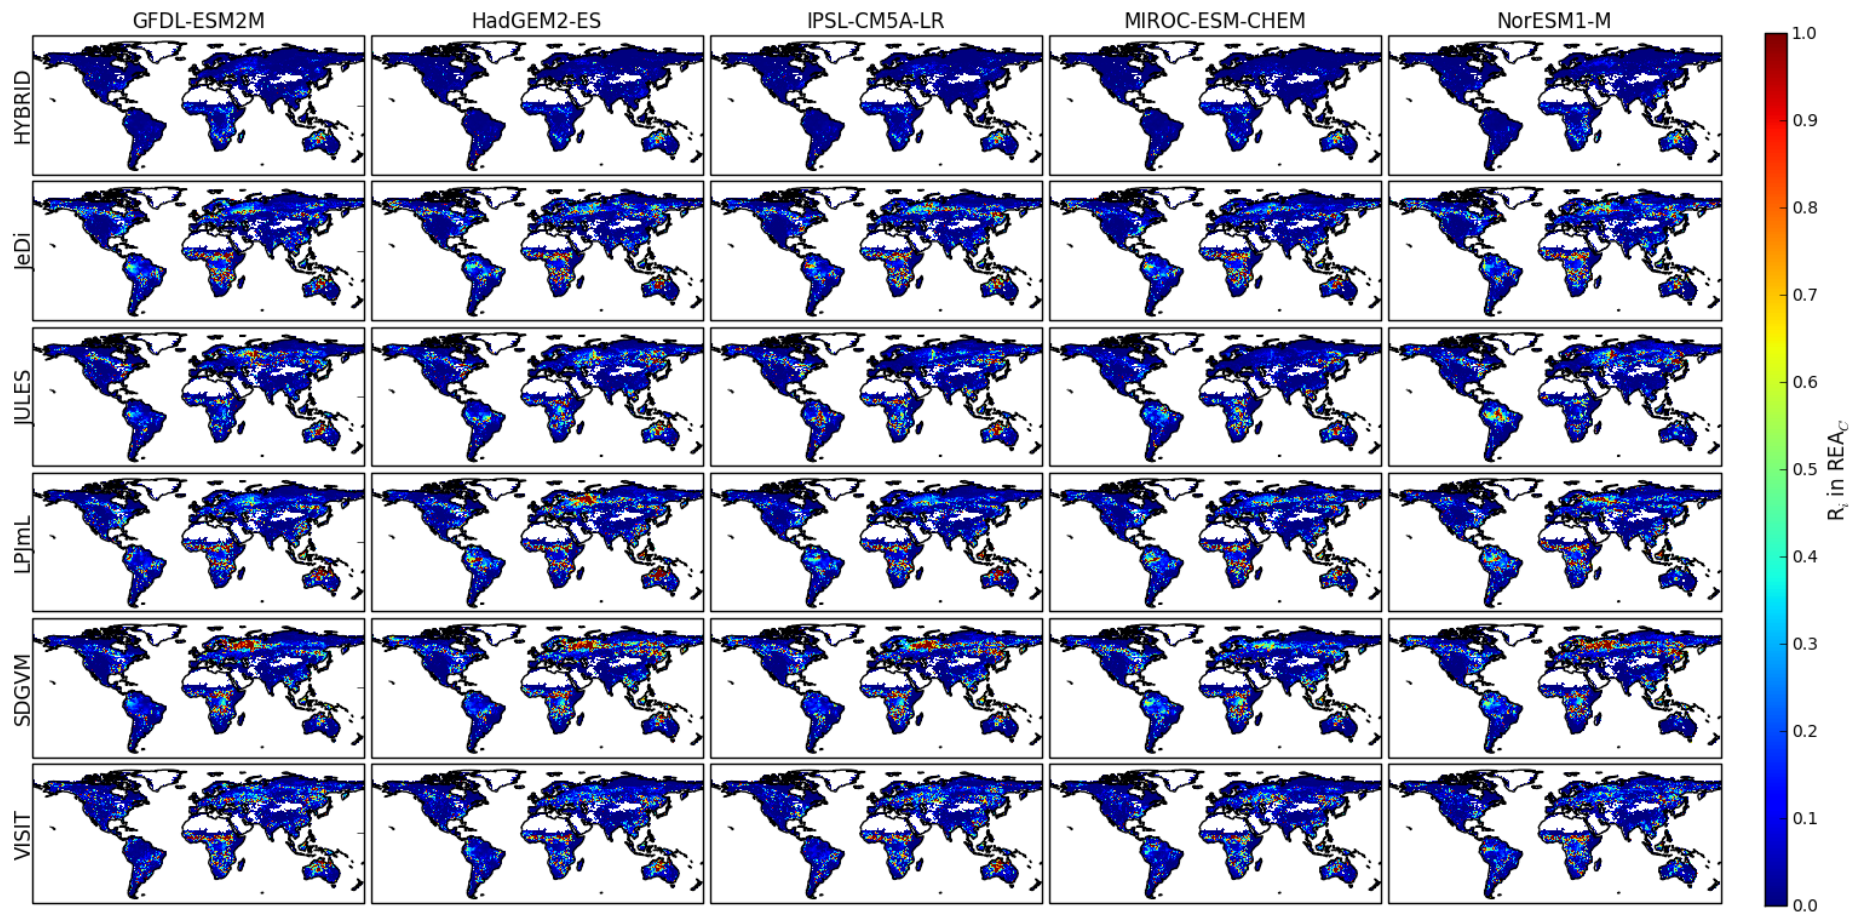

26

27 Figure S4. Models weights  $R_i$  assigned to each model in the REAc.

28

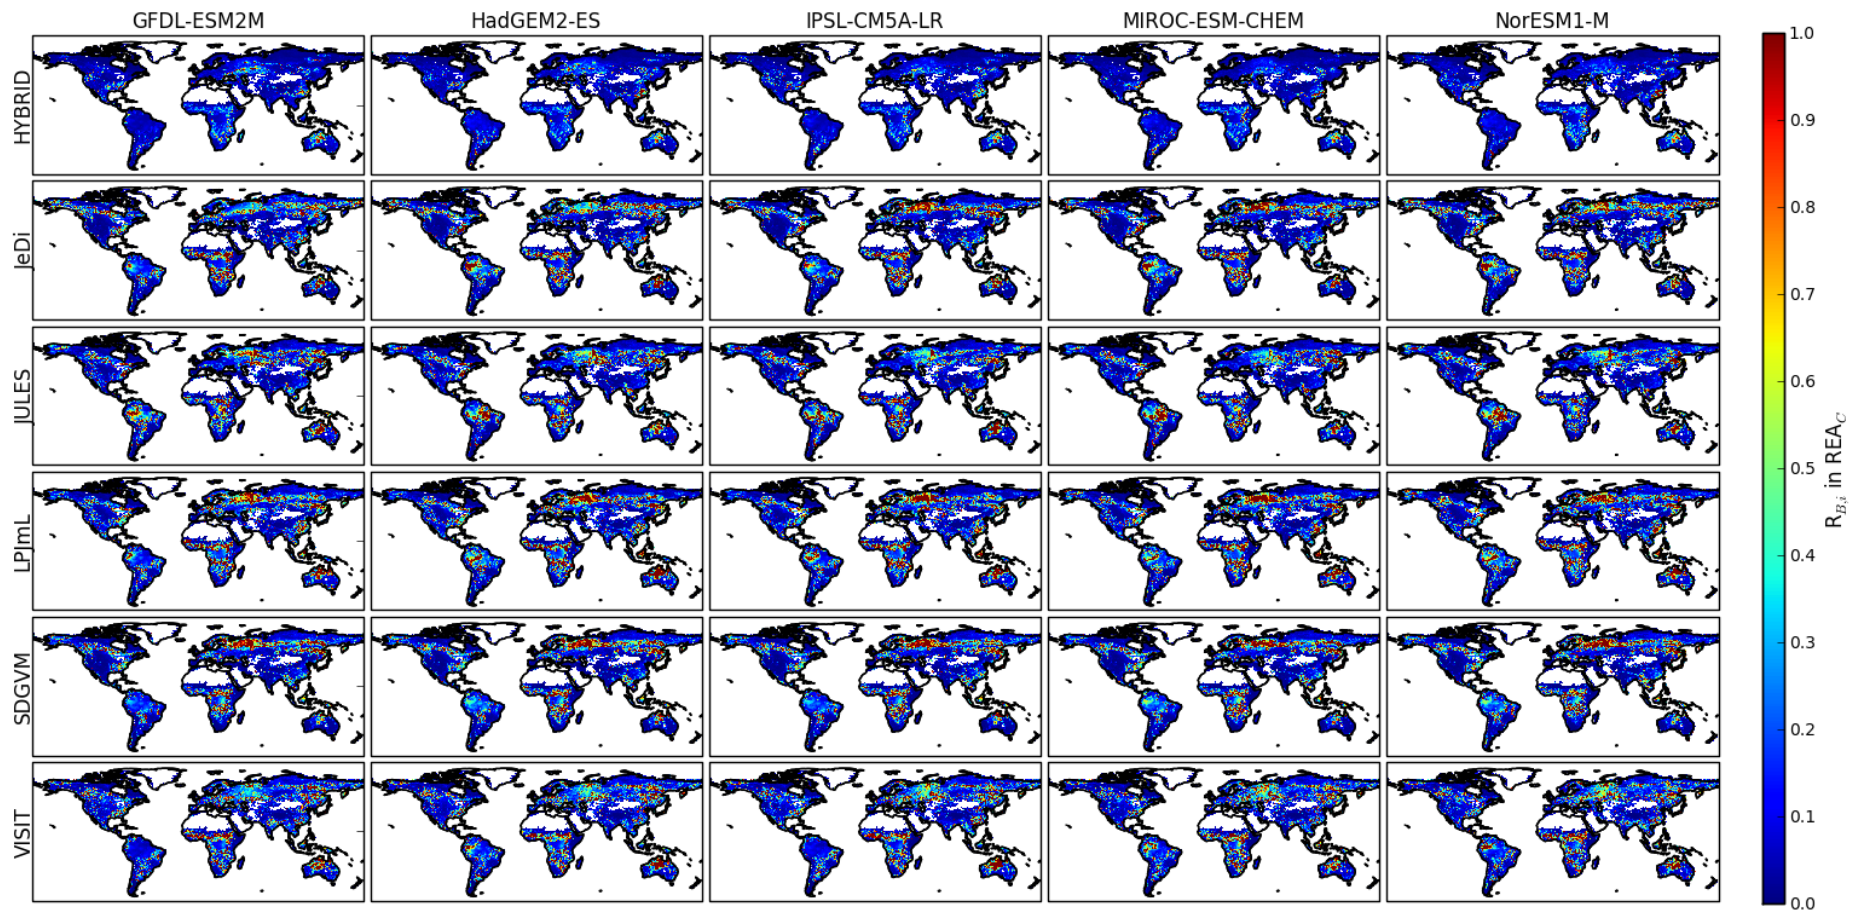

30

31 Figure S5. Performance based model weight  $R_{B,i}$  assigned to each model in REAC.

32



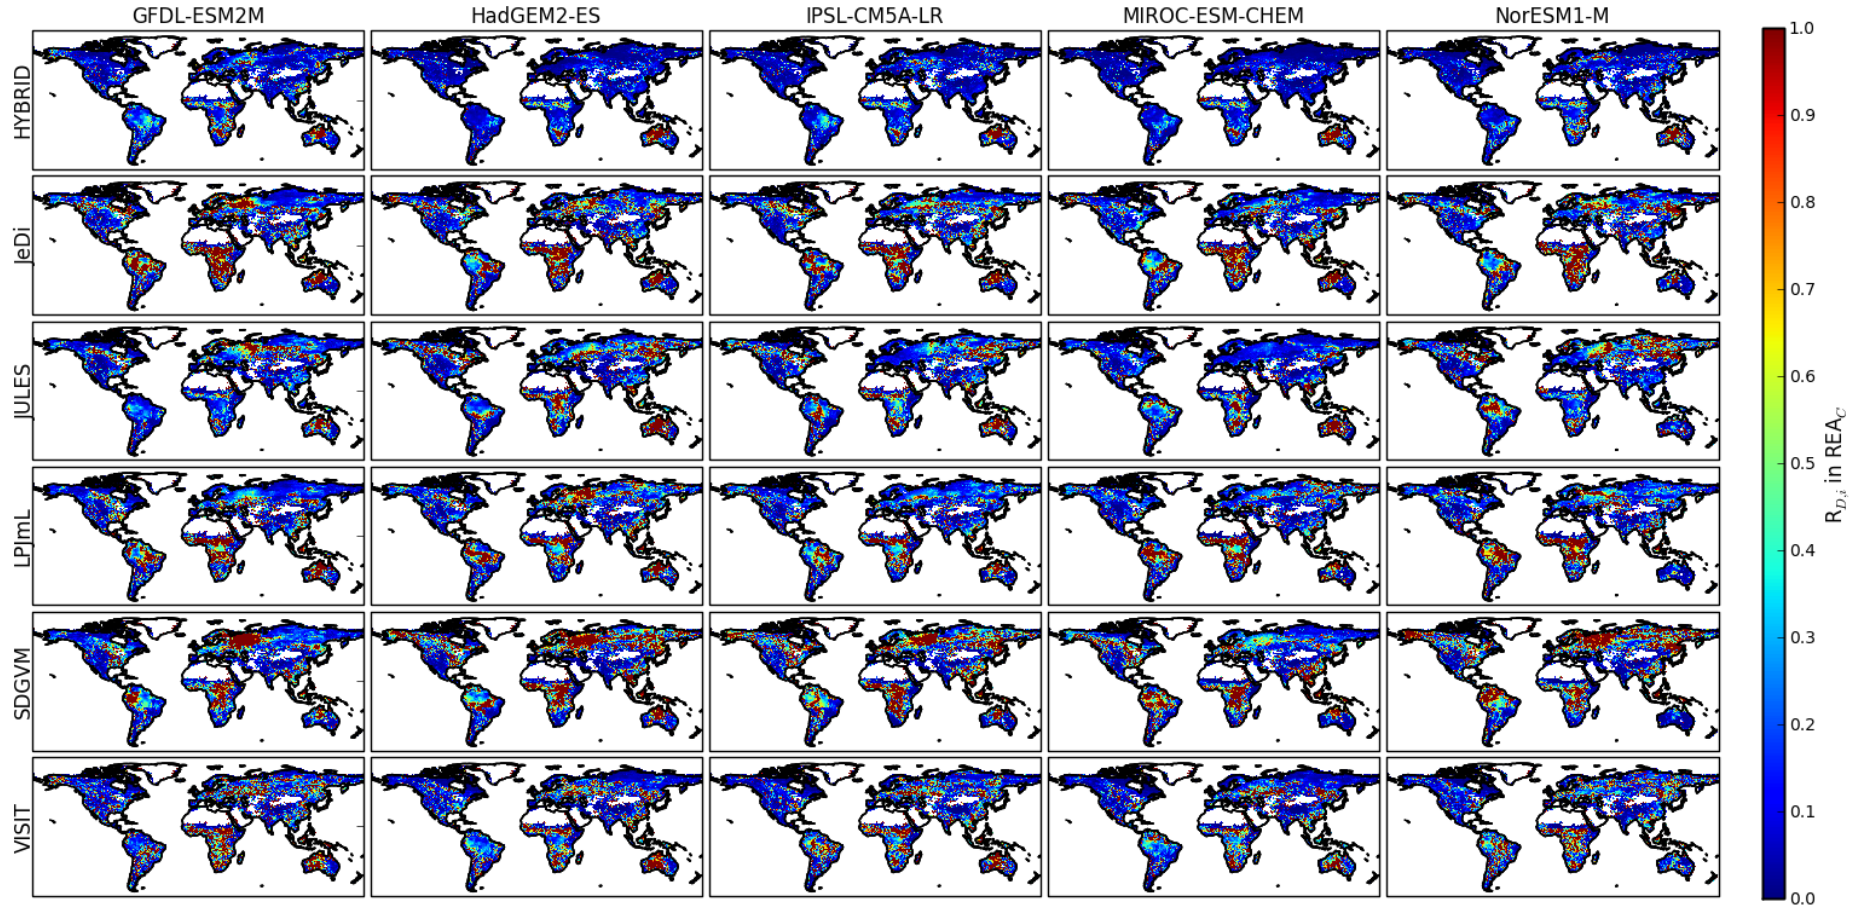

33

34 Figure S6. Convergence based weight  $R_{D,i}$  assigned to each model in REA<sub>C</sub>.

35

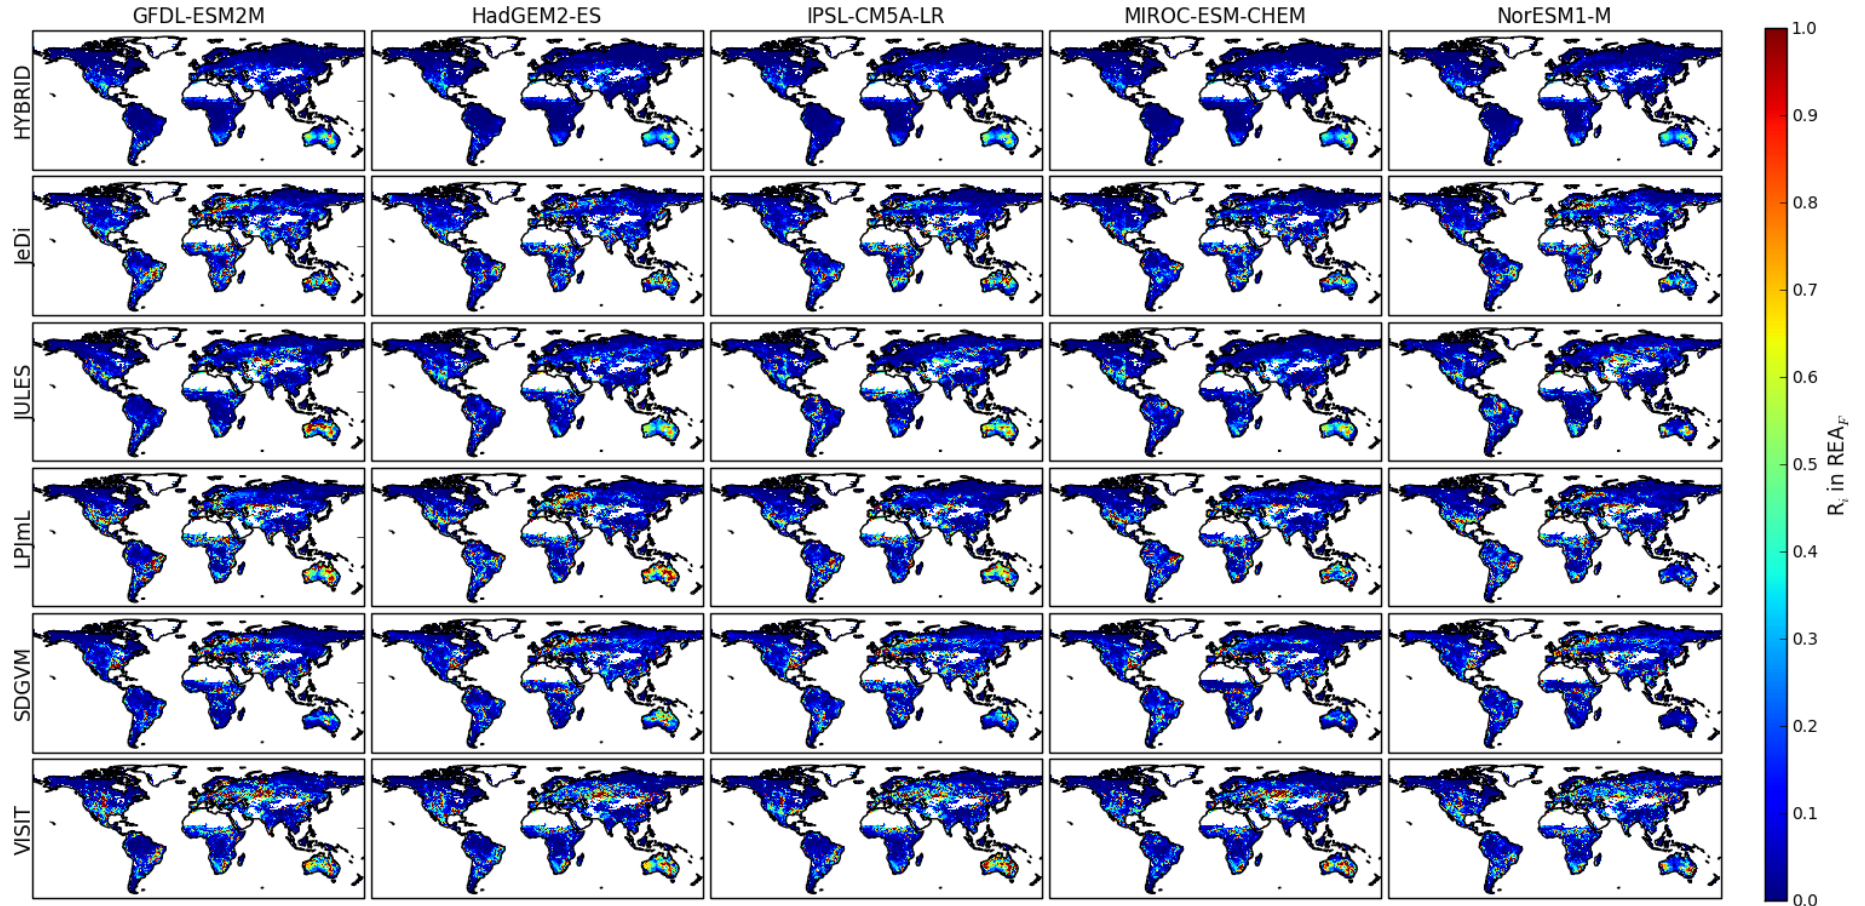

36

37 Figure S7. Models weights  $R_i$  assigned to each model in the REA<sub>F</sub>.

38



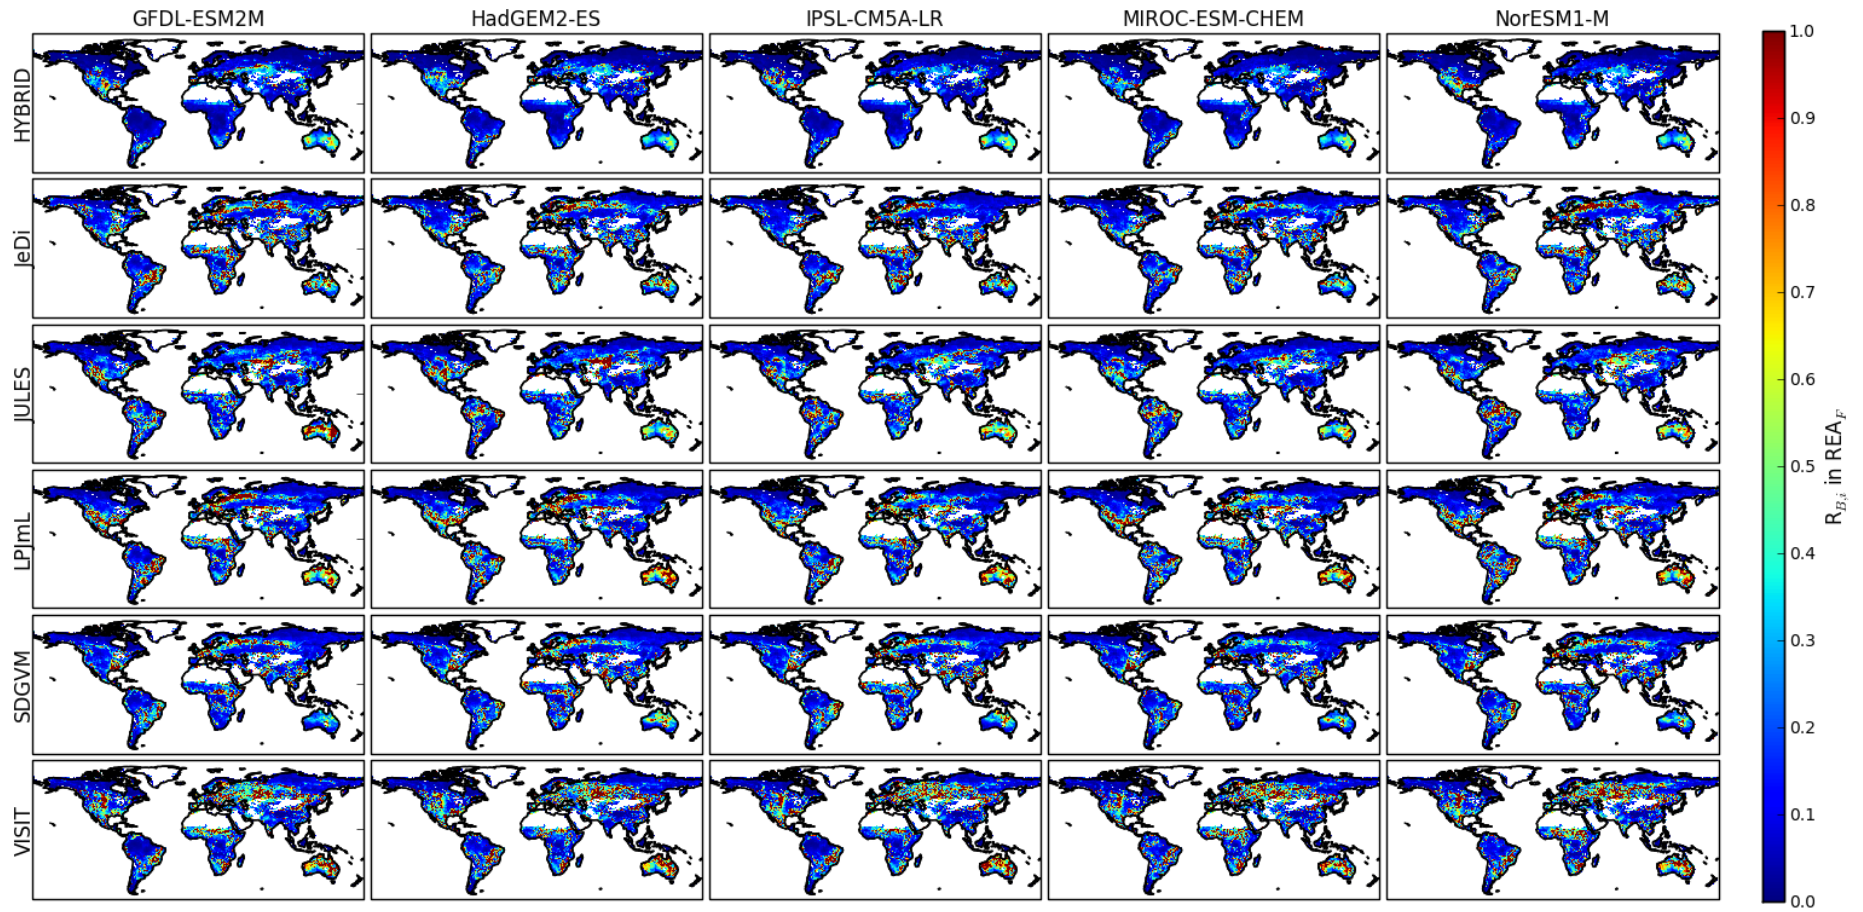

40

41 Figure S8. Performance based model weight  $R_{B,i}$  assigned to each model in  $REA_F$ .

42

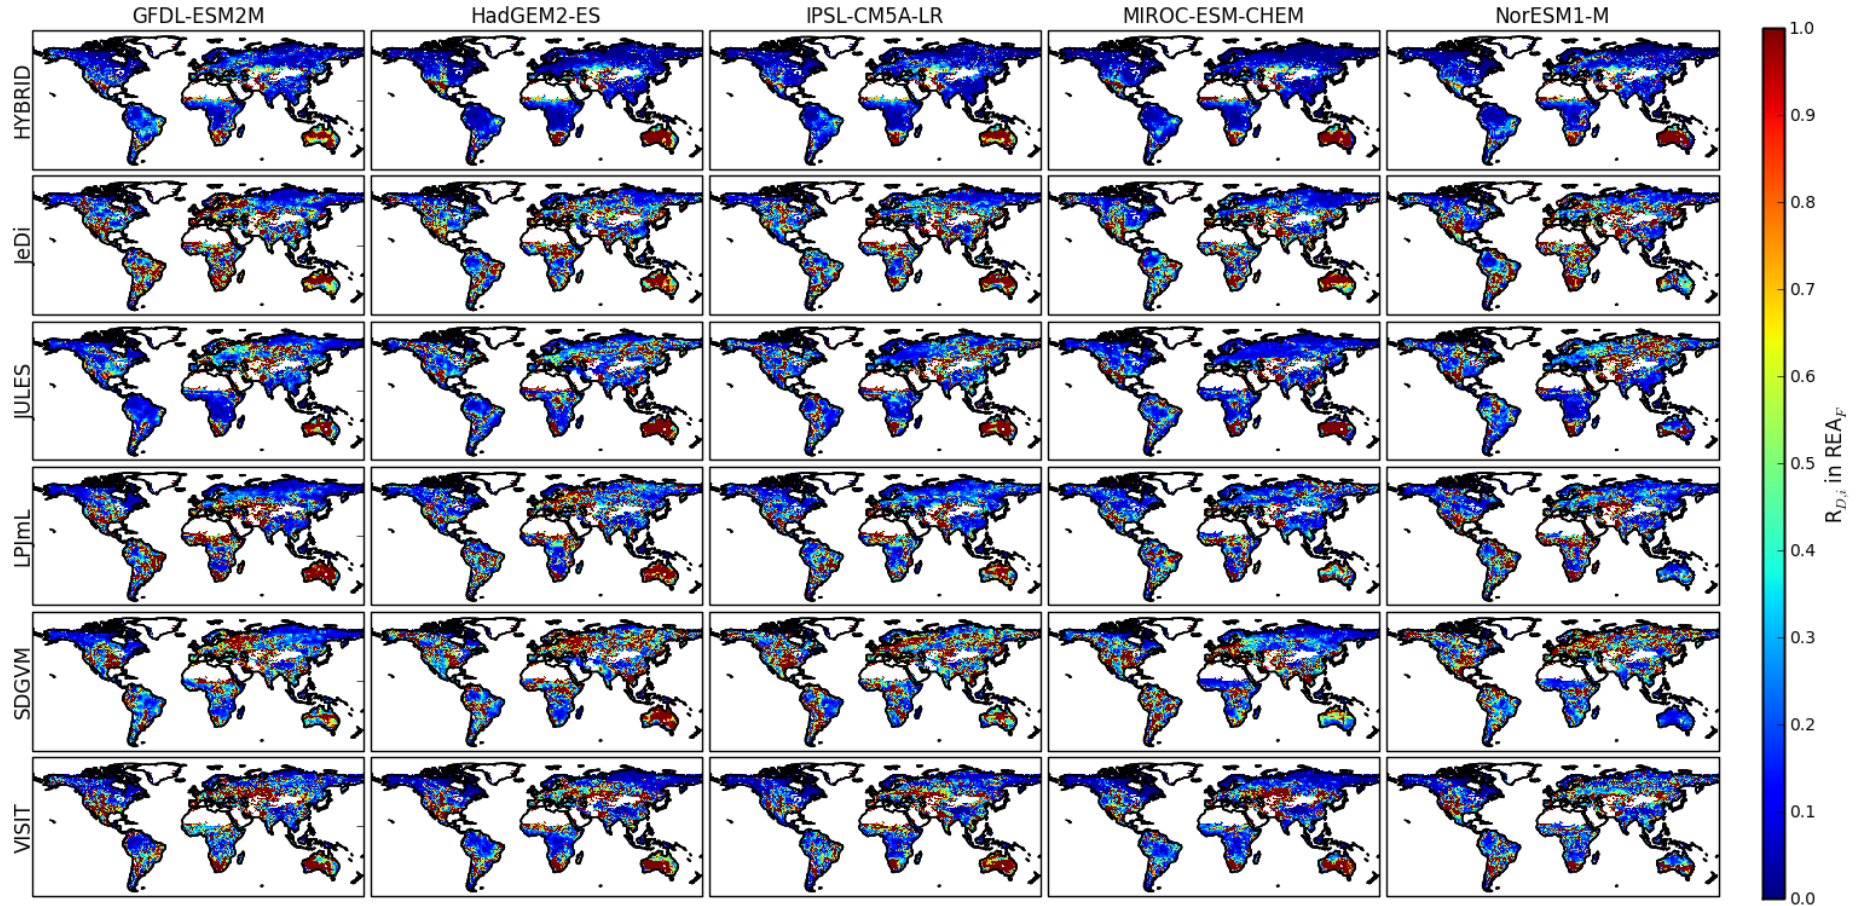

43

44 Figure S9. Convergence based weight  $R_{D,i}$  assigned to each model in  $REA_F$ .

45



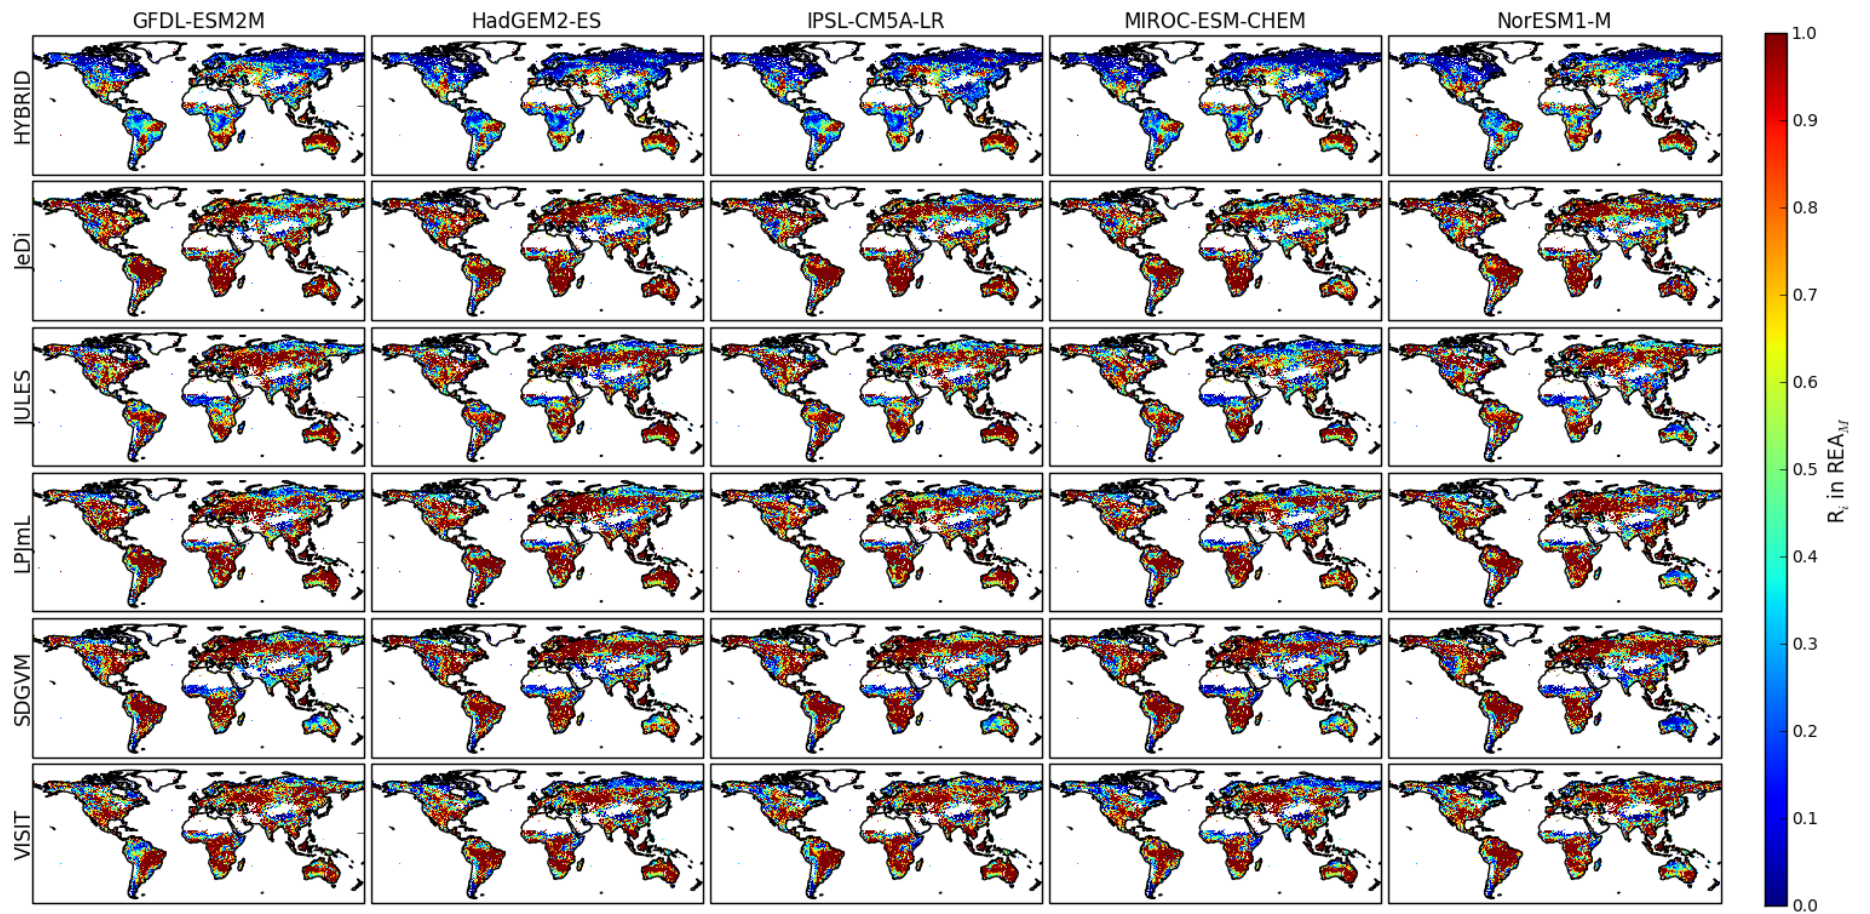

47

48 Figure S10. Models weights  $R_i$  assigned to each model in the REA<sub>M</sub>.

49



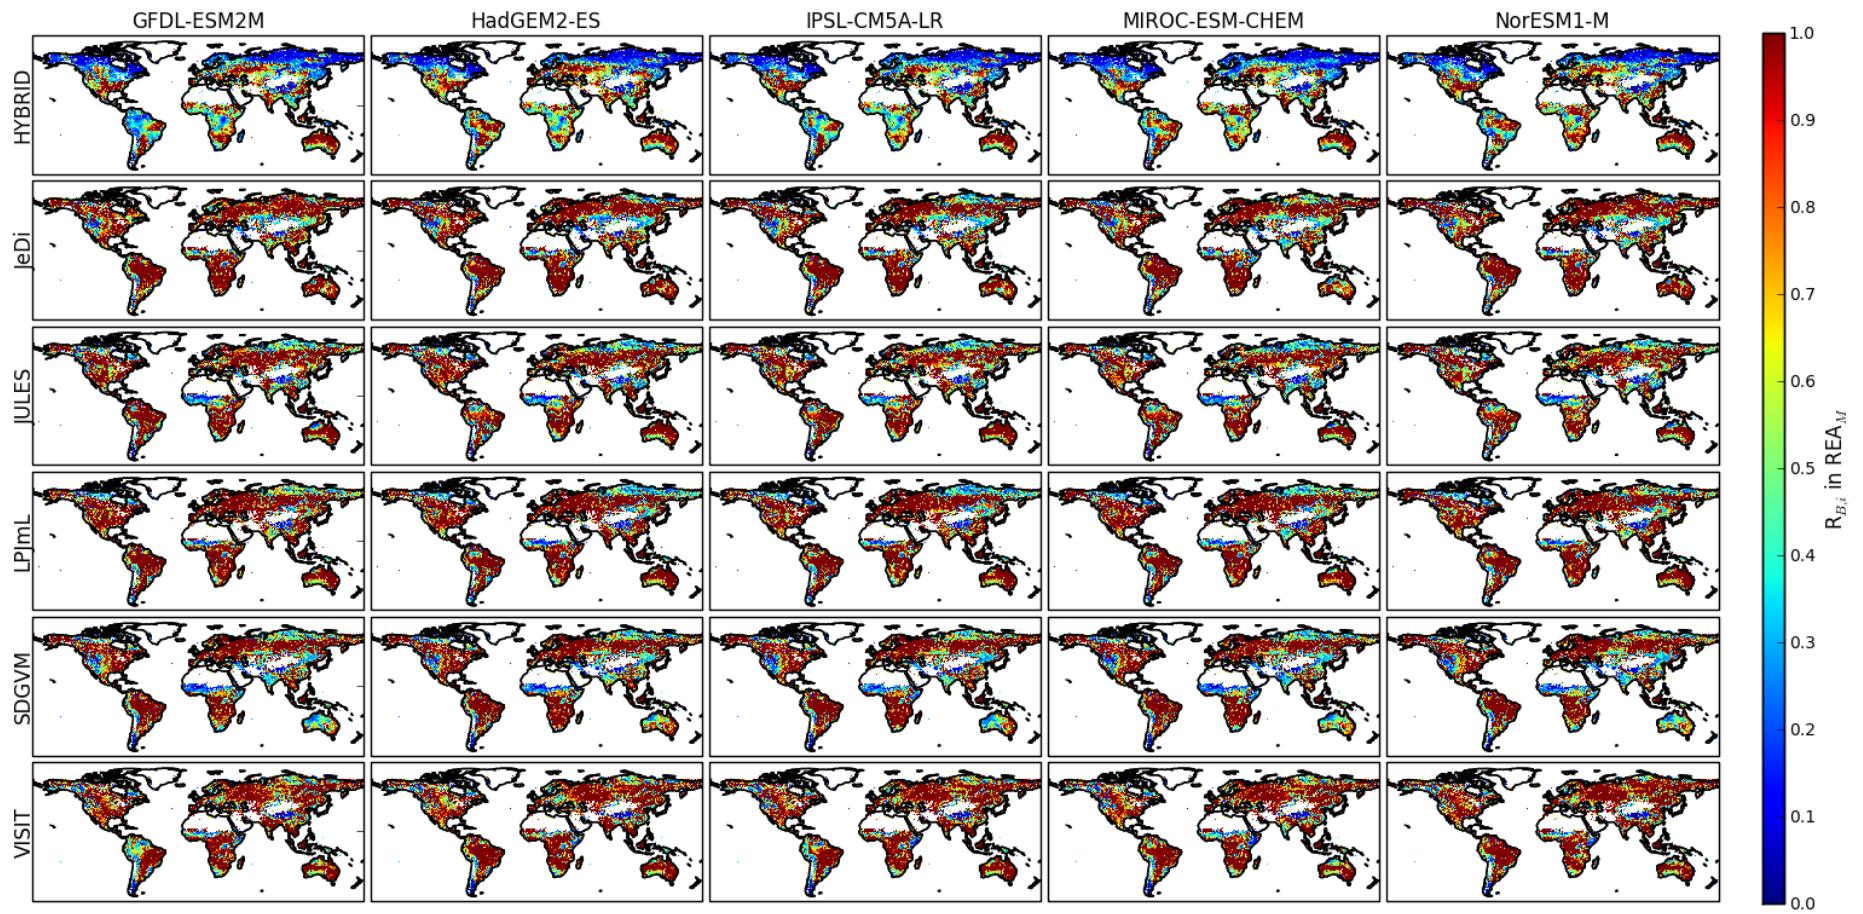

51

52 Figure S11. Performance based model weight  $R_{B,i}$  assigned to each model in  $REA_M$ .

53

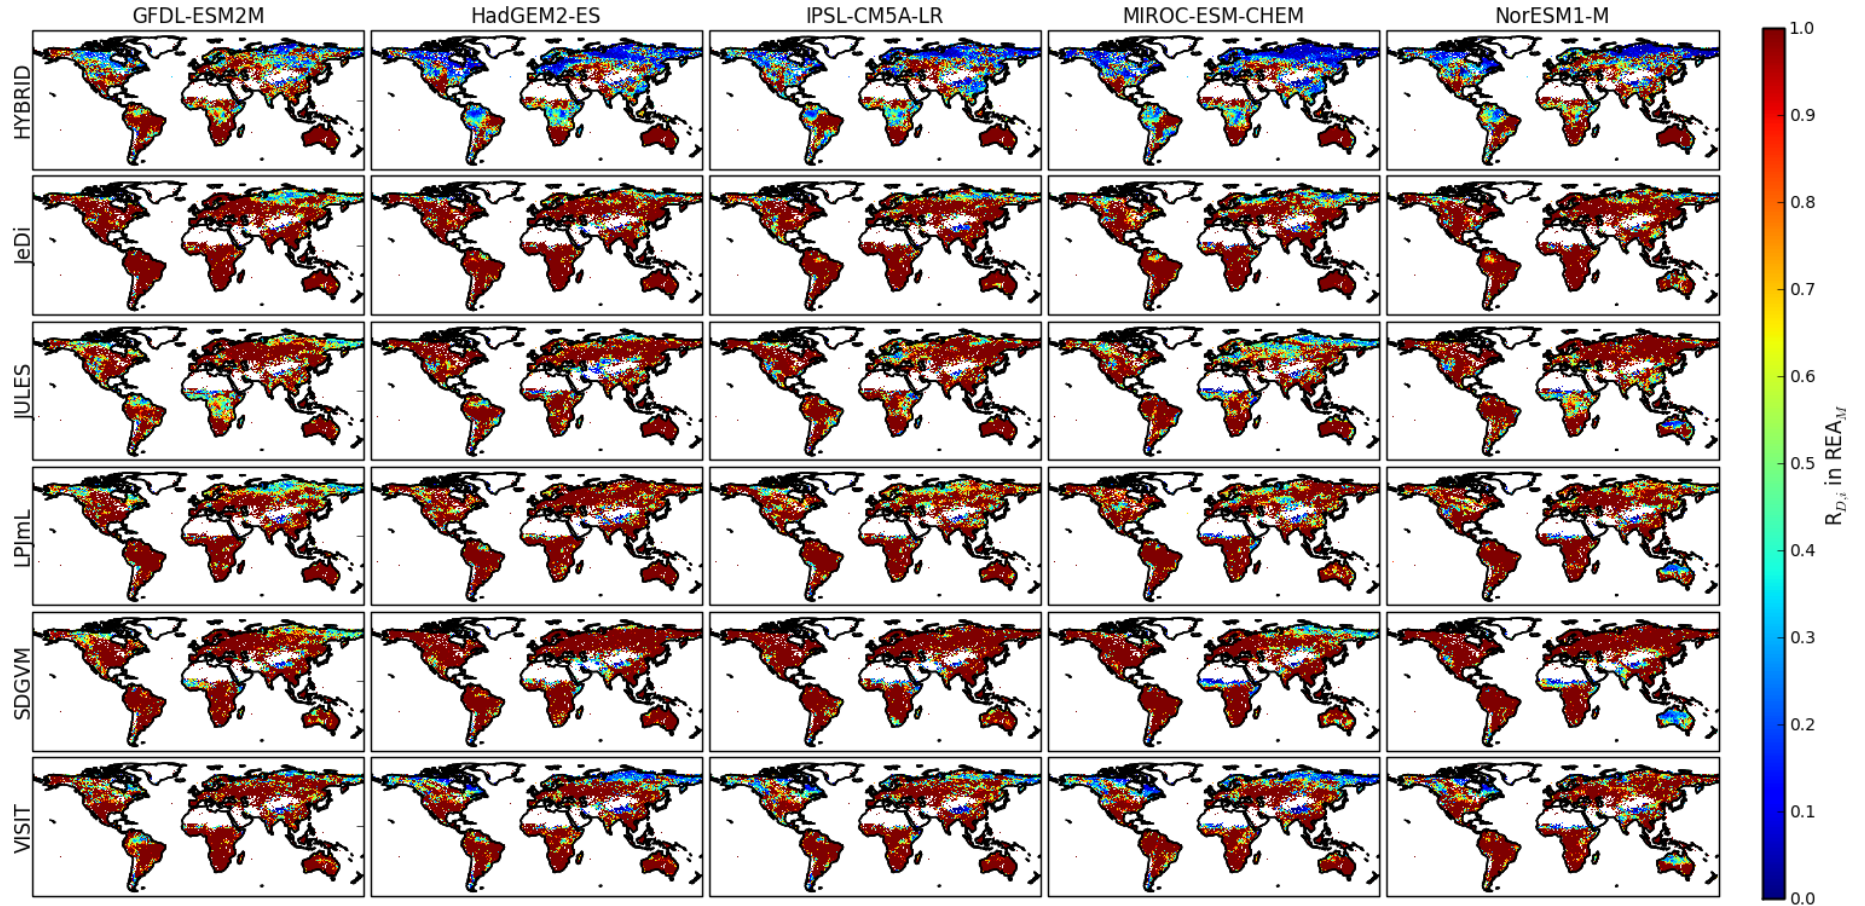

54

55 Figure S12. Convergence based weight  $R_{D,i}$  assigned to each model in  $REA_M$ .

56
